# Supplementary material for: Decision making for transformative change: exploring model use, structural uncertainty and deep leverage points for change in decision making under deep uncertainty
Source: Frontiers journal article supplement (doi:10.3389/fclim.2023.1129378), 2023-06-13
Supplement: Table_1.XLSX [file Table_1.XLSX]

## Sheet: Cover Sheet
Cover Sheet
This spreadsheet contains supporting information to the article "Decision making for transformative change: Exploring systemic uncertainty and deep leverage points in methods for Decision Making Under Deep Uncertainty" by Sheridan Few, Muriel Bonjean Stanton, and Katy Roelich.
The "Paper Summaries" sheet contains details of all the papers fully reviewed for this study. They are arranged by sector. The extent to which these papers consider structural uncertainty according to our review is indicated in the column "Structural Uncertainty Location". The deepest leverage point for change which case studies target is assessed according to Abson et al.'s 12 point heirarchy.
The "Analysis" sheet counts the number of papers using each RDM method, addressing each sector, addressing uncertainty to differing extents, and targetting different leverage points for transformative change based upon entries in the "Paper Summaries" sheet.
The "Search Terms" sheet shows the search terms used in conducting this reiew, and the number of hits for different search terms.

## Sheet: Paper Summaries
Basic Details			Background					Uncertainties (X)				Actions/Levers (L)					Relationships (R)		Measures (M)
Case study number (organised by sector, then structual uncertainty)	Case study name	Reference	Additional References	DMDU used	Sector(s)	Geographical coverage	Focus	Uncertainties (X)	Uncertainty Types	Scenario/Structural/Both	Structural Uncertainty Location	Actions/Levers (L)	L Types	L max depth in model (Abson 1 - 12)	L potential max depth	L depth explanation	Relationships/model(s) (R)	Model type	Measures (M)
1	Electricity Generation Rehabilitation in Turkey	Bonzanigo, L. and Kalra, N. (2014) Making informed investment decisions in an uncertain world: a short demonstration. The World Bank. Available at: http://documents.worldbank.org/curated/en/465701468330278549/Making-informed-investment-decisions-in-an-uncertain-world-a-short-demonstration.		Robust Decision Making	Power	Turkey	Profit	Electricity price Discount rate Life of plant Capacity Utilisation Capital costs Construction time Cost of fossil fuels (severa lseparately specified for different plant options)	Economic Lifetime Implementation Time	Scenario Only	None	1. Rehabilitating the existing local lignite-fired power plant; 2. Building a new local lignite-fired power plant; 3. Building a new imported coal-fired power plant; 4. Building a new gas-fired power plant; 5. Building a new lignite fluidized bed power plant, which would be fired by a higher quality coal than local lignite.	Infrastructure	10	10	New infrastructure -> changing material flows	Economic model (referenced)	Economic model	Cost (lower than any other option) •IRR >= 12%
2	EU power sector emissions reduction	﻿Hamarat, C. et al. (2014) ‘An exploratory approach for adaptive policymaking by using multi-objective robust optimization’, Simulation Modelling Practice and Theory. Elsevier B.V., 46, pp. 25–39. doi: 10.1016/j.simpat.2014.02.008.		Exploratory Modeling	Power	EU		Economic lifetime Learning curve Economic growth Electrification rate Physical limits Preference weights Battery storage Time of nuclear ban Price – demand elasticity	Economic, Technological, Societal	Both	Parameter	Subsidy Additional decommissioning of nonrenewables	(Dis)incentive	12	12	Parameter changes as per Meadows' definitions	EU electricity system model	System Dynamics	Renewable fraction CO2 reduction Cost
3	Flexible design at the Batoka Dam, Zambia and Zimbabwe	Swanson, A. R., Sakhrani, V. and Preston, M. S. (2019) ‘Flexible design at Batoka Dam: How Real Options Analysis compares to other decision-making tools’, Renewable Energy Focus, 31, pp. 1–8. doi: https://doi.org/10.1016/j.ref.2019.05.001. AND Swanson, A. R. (2017) How to Model the Value of “Real Options,” as Determined by Flexible Design Principles, for Hydropower Facilities in Developing Nation…		Robust Decision Making	Power, Water	Zambia and Zimbabwe, Africa	Profit	Climate scenario (unconstrained/constrained emissions)	Climatic	Scenario Only	None	• Size of hydro dam • Flexibility to expand dam (seemingly only considered in ROA and CBA, not RDM)	Infrastructure	10	10	New infrastructure -> changing material flows	WEAP model	Real Options	Cost-benefit (including constrution of plant & revenue generation) - regret analysis also performed, and value of optional flexibility in real-options-analysis.
4	Hydropower system design in Nepal	Hurford, A. P. et al. Efficient and robust hydropower system design under uncertainty - A demonstration in Nepal. Renew. Sustain. Energy Rev. 132, 109910 (2020).		MORDM	Power, Water	Nepal	Profit	Physical system uncertainties: • River flows • Extraction demands • Environmenal flow releases Social, financial, and economic uncertainties: • Construction cost • Discount rate • Plant lifetime • Electricity price	Environmental Economic Lifetime Implementation Time	Scenario Only	None	Which of five proposed hydropower schemes to build	Infrastructure	10	10	New infrastructure -> changing material flows	An Interactive River-Aquifer Simulation (IRAS-2010, [45]) Koshi River basin model was built and refined in consultation with stake- holders	Other	1) capital expenditure (capex) (US$M) 2) dry season electricity generation (Dec–April, GWh) 3) total annual electricity generation (GWh) 4) firm electricity generation with 99.5% reliability (GWh) 5) urban water deficit (Mm3/year) 6) irrigation deficit (Mm3/year) 7) flood peak at the basin outlet (m3/s) 8) number of environmental flow failures downstream of dams (occurrences)
5	Greater Buffalo-Niagara Regional Transport	Milkovits, M. et al. Exploratory Modeling and Analysis for Transportation: An Approach and Support Tool - TMIP-EMAT. Transp. Res. Rec. 2673, 407–418 (2019).		Exploratory Modeling	Transport	Greater Buffalo-Niagara Region, USA	Transition	• Households and employment in region • Roadway capacity (framed as % increase due to AVs) • Auto in-vehicle time coefficient (IVVT, didn’t really understand this one) • Vehicle availability alternative specific constants	Societal Technological	Both	Parameter	• decommissioning of Expressway • extension of light-rail transit (LRT) "These two levers were selected for the EMA proof of concept because they are representative of projects under consideration by agencies in the region. Both levers address an overall goal of decreasing vehicle miles tra- veled (VMT) in the region, increasing alternative modes of travel (e.g., non-motorized and transit) and in…	Infrastructure	10	10	New/removed transport routes -> changing material flow structure	• Meta-model built based on four stage model	Four Stage	Demand (LRT Transit boardings)
6	Spatial impact of AVs in Copenhagen	Legêne, M. F., Auping, W. L., Correia, G. H. de A. & van Arem, B. Spatial impact of automated driving in urban areas. J. Simul. 14, 295–303 (2020).		Exploratory Modeling	Transport	Copenhagen, Denmark	Capacity management	• the penetration rate of Avs • the efficiency of vehicle operation • the value of travel time • the number of trips • the idle time of Avs • parking density • ridesharing usage	Societal Technological	Both	Parameter	Not explicitly explored (EMA not RDM)		N/A	N/A		SD model geographically disaggregated across Copenhagen (including population dynamics, land use, traffic, parking, and modal split - endogenously modelled based on local data). Zones classified according to district type (city centre, other urban, suburbs, rural areas) - perhaps relateable to TfGM spaial themes	System Dynamics	• Population • Land use for road (mapped and broken down by region type)
7	Adoption of natural gas vehicles (NGVs) in Jakarta, Indonesia	﻿Hidayatno, A., Jafino, B. A., Setiawan, A. D. & Purwanto, W. W. When and why does transition fail? A model-based identification of adoption barriers and policy vulnerabilities for transition to natural gas vehicles. Energy Policy 138, 111239 (2020).		Exploratory Modeling	Transport	Jakarta, Indonesia	Transition	• Gas fuel price • Oil fuel price • Converter kit price • Contact rate • Annual kits price reduction • Minimum affordability threshold • Maximum affordability threshold • Minimum distance threshold (distance from home to refuelling station) • Maximum distance threshold	Economic Societal Technological	Both	Parameter	Kit subsidy policy Free kit policy Infrastructure enhancement policy (more LNG refuelling stations) Integrated policy (combination of the above)	(Dis)incentive Infrastructure	10	10	New LNG refuelling infrastructure -> changing material flows	Agent based model of car owner behaviour	Agent Based	NGV adoption (also calculate average number of ppl in different adopter states: potential, aware, evaluating, deciding, adopter across sets of levers).
8	Sacramento Transit	Lempert, Robert, James Syme, George Mazur, Debra Knopman, Garett Ballard-Rosa, Kacey Lizon, and Ifeanyi Edochie. ‘Meeting Climate, Mobility, and Equity Goals in Transportation Planning Under Wide-Ranging Scenarios: A Demonstration of Robust Decision Making’. Journal of the American Planning Association 86, no. 3 (2 July 2020): 311–23. https://doi.org/10.1080/01944363.2020.1727766. AND (Sacramento…		Robust Decision Making	Transport	Sacramento, California, USA	Transition	• Gas price (cost) • Fuel efficiency (cost) • Employment growth (economy) • ZEV penetration (fleet mix) • Millennial behavior (VMT) • VMT elasticity wrt growth (VMT) • VMT elasticity wrt driving cost (VMT)	Economic Technological Societal	Both	Parameter	(2016 MTP/SCS as background) • VMT fee • ZEV incentives	(Dis)incentive	12	12	Parameter choices	Elasticity based model	Elasticity	• Total GHG emissions • SB 375 emissions • Mobility • Equity
9	Airport strategic planning in the Netherlands	Kwakkel, J. H., Walker, W. E. and Marchau, V. A. W. J. (2012) ‘Assessing the Efficacy of Dynamic Adaptive Planning of Infrastructure: Results from Computational Experiments’, Environment and Planning B: Planning and Design. SAGE Publications Ltd STM, 39(3), pp. 533–550. doi: 10.1068/b37151.		Dynamic Adaptive Planning	Transport	Schipol airport, Amsterdam, Netherlands	Capacity management	• Air traffic growth • Population growth in area • Noise impact of planes • Changing wind conditions due to climate change • Air traffic management • Ratio of narrow:wide aircraft (Other variables considered falling into these categories)	Societal Environmental Technological	Scenario Only	None	Basic plan hedging & shaping • Noise abatement procedures (test) • Land-use reservation for new runway • negiotiate w. air traffic control to enable noise abatement through "continuous descent" • R&D in noise abatement Contingency plan reassessment, corrective, defensive, capitalising: •Build new runway (takes 5 yrs) • Move some operations to other airports • limit/extend available slots	Infrastructure Operational Regulation	10	5	10 from new runway & land-use reservation. Some subjectivity required here wrt whether "negotiate w air traffic control to enable noise abatement" constitutes a parameter change (12) or rule change (5). Referring to Meadows 1999, rule changes appear to represent more fundamental changes to system structures, whilst this targets a particular parameter. Therefore it has been assigned 12.	"fast and simple model for airpost performance analysis" (FASMAPA) (coded in python)	Other	Capacity to accomodated demand ratio Noise Emissions (CO) Third party risk (of crash) & casualties Accumulated latent demand (flights) (Some of the above cosidered at maximum levels and after 30 years)
10	Intercity rail & road capacity between London and Manchester	﻿Hadjidemetriou, G. M., Kapetas, L. & Parlikad, A. K. Flexible planning for inter-city multi-modal transport infrastructure. J. Infrastruct. Syst. (2021). doi:10.1061/(ASCE)IS.1943-555X.0000664		Dynamic Adaptive Policy Pathways	Transport	UK	Capacity management	Travel demand (&date) - not really treated as uncertainty - demand growth based on linear extrapolation from past, with additional time-elasticity induced demand due to planned interventions (road/rail) - seems only one pathway considered	Societal	Scenario Only	None	• HS2 Phase 2b • HS2 Phase 1 and 2a • Use of 11-car trains • Operate M1 and M6 as Smart Motorways • EV infrastructure • AV infrastructure	Infrastructure Operational	10	10	New transport routes -> changing material flow structure	Elasticity based model linking interventions changing journey time to induced demand, against backdrop of overall demand projections	Elasticity	Not a clear measure, but comparison of road/rail capacity to demand made by year, based upon baseline projections and elasticity induced demand
11	Airplane manufacturing in the USA	Kotta, K. S. V. (2018) Comparing Decision Making Using Expected Utility, Robust Decision Making, and Information-Gap: Application to Capacity Expansion for Airplane Manufacturing. Iowa State University. Available at: https://lib.dr.iastate.edu/creativecomponents/26/.		Robust Decision Making and Info-Gap	Transport	North America	Capacity management	Parameters determining probabiity distribution of annual orders of planes: • Central demand (mu) • S.d. in demand per year (sigma) • Shape of distribution • Risk tolerance/optimism	Societal	Scenario Only	None	Year to construct 1st and 2nd hangar	Infrastructure	12	12	Year of construction rather than whether to construct -> parameter	Expected utility model based on aircraft sales & costs	Cost Benefit	• Expected utility (profit) • Upper & lower bounds
12	Rotterdam port competitiveness	Halim, R. A., Kwakkel, J. H. & Tavasszy, L. A. A scenario discovery study of the impact of uncertainties in the global container transport system on European ports. Futures 81, 148–160 (2016).		Exploratory Modeling	Transport	Global (focus on Rotterdam port)	Resilience	• Cost of hinterland connections in Europe • Hinterland cost for Rotterdam • Travel time of the hinterland connections of Rotterdam • Costs of the hinterland connection of Mediterranean ports • Handling costs of the Mediterranean ports • Handling costs of ports in the Bremen and le Havre range • Trade volume with Asia that is affected by availability of overland connection or shift of production …	Economic Societal Technological Physical	Scenario Only	None	Not explicitly explored (EMA not RDM)		N/A	N/A		Ihntroduce a "strategic global container network choice model". Elements of four stage model - generating OD paris and identifying optimal shipping routes based upon these	OD pair	Fractional increase in: • Throughput (goods arriving/leaving) • Transhipment volume (unloading and loading onto another ship) Compared to reference case
13	Preparation and Appraisal of a Rural Roads Project in Mozambique under Changing Flood Risk and Other Deep Uncertainties	Espinet, X., Rozenberg, J. and Ogita, K. S. R. S. (2018) Piloting the Use of Network Analysis and Decision-Making under Uncertainty in Transport Operations: Preparation and Appraisal of a Rural Roads Project in Mozambique Under Changing Flood Risk and Other Deep Uncertainties, Policy Research Working Papers. The World Bank. doi: doi:10.1596/1813-9450-8490.		Robust Decision Making	Transport, Water	Mozambique	Resilience	∙ Climate projections: current, low, medium and high ∙ Flood duration, -50% to +50% increase compared to the results of the hydrological model ∙ Traffic growth in the absence of interventions, 0 to 6% ∙ Traffic growth to agriculture increase elasticity, 0.5 to 1.5 ∙ Discount rate, ranging from 3 to 12% ∙ Repair time, -50% to +50% of original ∙ Capital Cost, -50% to +50% of original ∙ Bridge Repai…	Climatic Economic Societal	Both	Parameter	Upgrade to surface treatment Upgrade to gravel road Rehabilitation of earth roads Clean and repair bridges Replace culverts (five distint "Inventories of measures" based pon different combinations of the above in different locations)	Infrastructure	10	10	New infrastructure -> changing material flows	Traffic model	OD pair	∙ Cumulated Road user cost or RUC, defined as $-vehicle and based on road condition (IRI) ∙ Total kilometers traveled ∙ Total travel time, based on average speed from HDM4 based on road condition (IRI)
14	Managing sea level rise and storm surges for the Los Angeles Port, USA	Sriver, R. L. et al. (2018) ‘Characterizing uncertain sea-level rise projections to support investment decisions’, PloS one. Public Library of Science, 13(2), pp. e0190641–e0190641. doi: 10.1371/journal.pone.0190641.		Robust Decision Making	Transport, Water	Los Angeles, USA	Resilience	Sea level rise: • Rate of abrupt sea-level rise • Year abrupt rise begins (t) • Daily anomoly Future terminal management: • Lifetime • Max allowable overtop probability (port of LA authority's decision)	Climatic Societal Lifetime Implementation Time	Scenario Only	None	• "Harden" current already planned upgrade of port to make "invulnerable to plausible levels of sea level rise". • Don't enhance current upgrade, harden at a later date if flooding frequency becomes unacceptable	Infrastruture	10	10	New infrastructure -> changing material flows	Cost-benefit model developed for the study	Cost Benefit	cost-benefit analysis - "A decision to harden at the next upgrade would pass an economic cost-benefit test if the cost for doing so is less than the expected present value cost of any future early upgrade forced by sea-level rise" - costs of flooding not considered, but cost of upgrading port to keep within uncertain authority requirements w uncertain sea level rice
15	Improving the resilience of road networks to climate events in Peru	Rozenberg, J. et al. (2017) Improving the Resilience of Peru’s Road Network to Climate Events, Policy Research Working Papers. The World Bank. doi: doi:10.1596/1813-9450-8013.		Robust Decision Making	Transport, Water	Peru	Resilience	• intensity, frequency, and duration of climate-related events • structural impact of water levels on the road; • amount of traffic to be rerouted when a flood or landslide hits •time and total cost of reconstructing a road after a disaster.	Climatic, Technological, Societal, Implementation Time	Both	Functional Form	Pro-active: •More frequent road maintainence • Road upgrade • Add redundancy (improve "second best" roads for alternative routes) Reactive: • Rebuild road after disaster	Infrastructure Operational	10	10	New infrastructure -> changing material flows	Traffic model	OD pair	Cost/benefit (" discounted sum of the difference between the costs of interventions (investment and operations and maintenance) and the avoided average annual losses (AAAL) every year over the life cycle of the investment:") Cost/benefit incorporates costs of levers, cost of rebbulding roads following damange, economic costs associated with disruption to roads
16	Flood resilience for San Francisco–Oakland Bridge, Califronia, USA	Singh P, Ashuri B, Amekudzi-Kennedy A. Application of dynamic adaptive planning and risk-adjusted decision trees to capture the value of flexibility in resilience and transportation planning. Transportation Research Record. 2020;2674(9):298–310.		Dynamic Adaptive Planning	Transport, Water	California, USA	Resilience	Sea level rise timing (linked to climnate scenario)	Climatic	Scenario Only	None	Flood wall Raise Roadway Berm	Infrastruture	10	10	New infrastructure -> changing material flows	NPV model	Cost Benefit	Cost Benefit
17	Adapting water supply systems in a changing climate in Ireland	Hall, J. and Murphy, C. (2012) ‘Adapting water supply systems in a changing climate’, in Quinn, S. and O’Neill, V. (eds) Water Supply Systems, Distribution and Environmental Effects. Nova Science Publishers, Inc. Available at: http://mural.maynoothuniversity.ie/3011/1/Hall%26Murphy_2012.pdf.		Robust Decision Making	Water	Ireland	Capacity management	Climate scenario, Hydrological scenario	Climatic Environmental	Both	Relationships	Water demand reduction, Leakage reduction	Infrastructure Education	12	6	Demand reduction programmes treated as %age reduction in model -> parameter. However, they involve education -> structure of information flows -> potentially deeper lever	Hydrological Simulation Model (HYSIM)	Water Model	Water-use-to-resource ratio (water stress)
18	Water planning in Tandula complex in the Chhattisgarh state of India.	Jaiswal, R. K., Lohani, A. K. & Tiwari, H. L. A decision support system framework for strategic water resources planning and management under projected climate scenarios for a reservoir complex. J. Hydrol. 603, 127051 (2021).		RDM	Water	Tandula reservoir complex in the Chhattisgarh state of India.		Climate projection, GCM models, downscaling technique, demand/deficit, reservoir sediment, water availability, irrigation system	Climatic Environmental Physical Societal	Both	Functional Form	Efficiency enhancement, conjunctive use, management of irrigation releases	Operational Education	10	6	Efficiency enhancement specifically mentioned as requiring changing information flow, though modelled only in terms of %age efficiency increase	Water balance study, SWAT and SWAT-CUP model for water availability assessment and MIKE HYDRO Basin model for management and planning	Water Model	Saaty’s analytical hierarchical based relative performance index (RPI) using multiple criterions: demand, deficit, sustainability, vulnerability, reliability, and resilience
19	House elevation to reduce riverine flood risk in Pennsylvania, USA	Zarekarizi, M., Srikrishnan, V. & Keller, K. Neglecting uncertainties biases house-elevation decisions to manage riverine flood risks. Nat. Commun. 11, 1–11 (2020).	Supplementary information online	MORDM	Water	Selinsgrove, a rural location in Pennsylvania (PA) in the Eastern U.S.		Divide into "shallow" (one PDF) and "deep" (multiple PDFs. Deep: • Depth-damage function (two PDFs) • Discount rate (three PDFs) Shallow: • Flooding frequency (BUT function for this, given as "probability of annual maximum water level; AMWL; not exceeding level h", includes location, shape, and scale parameters selected from a normal distribution -> effectively different distributions in differen…	Environmental Physical Economic Lifetime	Both	Functional Form	Elevation height: (i) repairing flood damages as they occur, (ii) elevating the house to FEMA’s minimum recom- mended height, (iii) elevating the house to the cost-optimal heightening strategy neglecting-uncertainty, and (iv) elevating the house to the optimal height considering uncertainty.	Infrastructure	10	10	New infrastructure -> changing material flows	Flood damage model, not named, but emeges naturally from definition of levers and uncertainties	Water Model	• Total cost • Benefit/cost • Upfront cost/house value • Reliability • Robustness
20	Flood management, Po River, Italy	Ciullo A, Domeneghetti A, Kwakkel J, De Bruijn K, Klijn F, Castellarin A. Belief-Informed Robust Decision Making (BIRDM): Assessing changes in decision robustness due to changing assumptions in the distribution of deeply uncertain variables. Environmental Modelling & Software. 2022;159:105560. (2022) Available from: https://doi.org/10.1016/j.envsoft.2022.105560		Robust Decision Making	Water	Po River, Italy		Hydrograph’s duration for the Po River Hydrograph’s shape class for the Po River Hydrograph’s shape for the Po River Hydrograph’s peak discharge and volume for the Secchia and Panaro rivers Breaching water level at the levee stretches (WL stretch) – deep uncertainty Damage model parameter (DMRP)	Environmental Physical	Both	Functional Form	doing nothing levees raising levees strengthening	Infrastructure	10	10	New infrastructure -> changing material flows	quasi-2D hydrodynamic model	Water model
21	Long-term water management strategies for water supply in Southern California, USA	Lempert, R. J. and Groves, D. G. (2010) ‘Identifying and evaluating robust adaptive policy responses to climate change for water management agencies in the American west’, Technological Forecasting and Social Change, 77(6), pp. 960–974. doi: https://doi.org/10.1016/j.techfore.2010.04.007.		Robust Decision Making	Water	North America	Capacity management	• Future climate • Future water demand • Impact of climate change on imported supplies • Response of groundwater basin to urbanization and changes in precipitation patterns • Achievement of management strategies (Delay in recycling program, groundwater replenishment) • Future costs (of import/efficiency measures)	Climatic Societal Physical Economic	Both	Parameter	Actions associated w. 3 goals: • Improve water use efficiency (3 actions): Strengthen landscape ordinances for new construction, Retrofit indoor devices, Retrofit outdoor landscapes • Expand recycled water system (1 action): Speed up planned treatment and redistribution of all municipal wastewater • Expand groundwater replenishment & conjunctive-use programs (3 actions): Increase size of Dry-Year…	Infrastructure Retrofit	10	5	Changes explicitly relate to changing extent of already existing flows. Some of these levers involve changing rules. Considered in model as changing parameter ranges. (The processes leading to rule change aren't explicitly modelled)	WEAP model	Water Model	Water costs (supply and shortage)
22	Water resources planning under climate change in the Blue Nile, Ethiopia	Jeuland, M. and Whittington, D. (2014) ‘Water resources planning under climate change: Assessing the robustness of real options for the Blue Nile’, Water Resources Research. John Wiley & Sons, Ltd, 50(3), pp. 2086–2107. doi: 10.1002/2013WR013705.		Robust Decision Making	Water	Blue Nile, Ethiopia	Capacity management	Water withdrawal conditions, Hydrological conditions	Climatic Societal Environmental	Both	Parameter	Number of dams, Configuration, Sequencing (of dam build - upstream/downstream), Timing (of dam build) Sizing (of dams) Operating rule	Infrastructure Operational	10	10	Building dams will change structure of material flows. Judging rules here to be more like operational; parameters than rules as defined by Meadows.	"simulation model that includes linkages between climate change and system hydrology, combined with sensitivity analyses that explore how economic outcomes of investments in new dams vary with forecasts of changing runoff and other uncertaintis"	Water Model	NPV (of the system-wide incremental changes it generates within a water resources system (e.g., in hydropower produced, or irrigation water demands met)
23	Addressing climate change in local water agency plans in the California Sierra foothills, USA	Groves, D. G. et al. (2013) Addressing climate change in local water agency plans: demonstrating a simplified Robust Decision Making approach in the California Sierra foothills. Rand Corporation. Available at: https://www.rand.org/pubs/research_reports/RR491.html.		Robust Decision Making	Water	California Sierra Foothills, USA	Capacity management	Future climate conditions Demographics Availability of new (water) supplies	Climatic Societal Physical	Both	Parameter	Additional urban water use efficiency, New reservoir	Infrastructure Operational	11	11	New reservoir -> size of stock relative to flow	Water planning model of EID	Water Model	Unmet water demand and reliability Notional strategy costs
24	Regional water portfolio planning in North Carolina, USA	Herman, J. D. et al. (2014) ‘Beyond optimality: Multistakeholder robustness tradeoffs for regional water portfolio planning under deep uncertainty’, Water Resources Research. John Wiley & Sons, Ltd, 50(10), pp. 7692–7713. doi: 10.1002/2014WR015338.		Many-Objective Robust Decision Making (MORDM)	Water	North Carolina, U.S.A	Capacity management	Climate: Inflows multiplier Evaporation multiplier Demand: Consumer reductions multiplier Consumer reductions lag (weeks) Mean peaking factor Demand growth multiplier Standard deviation of demand variations Capacity: Falls Lake municipal supply allocation Jordan Lake municipal supply allocation Cary treatment capacity multiplier Transfer connection capacity multiplier Cost: Transfer cost ($/MG) I…	Climatic Societal Economic	Both	Parameter	Restriction threshold (risk-of-failure) Transfer threshold (risk-of-failure) Jordan Lake allocation Self-insurance payment (AVR%) Third-party insurance (discrete)	Operational Insurance	12	12	Parameters, don't relate to physical infrastructure/deeper lever changes	Research Triangle water supply model. This same model is used in 4 "formulations" where different options are open to operators of the four "interconnected ... co-operating water utilities" in the region	Water Model	Reliability Restriction frequency Average cost Jordan Lake allocation* Worst-case cost** * Jordan lake currently only serves one smaller community with water -> can be allocated to others ** Cost in worst 1% of simulations (seems a bit odd as presumably these are esxplored in X)
25	Water resources planning and management in the Susquehanna River Basin, USA	Kasprzyk, J. R. (2013) Many objective water resources planning and management given deep uncertainties, population pressures, and environmental change. Available at: https://etda.libraries.psu.edu/files/final_submissions/8222.		Many-Objective Robust Decision Making	Water	Lower Rio Grande Valley (LRGV) in Texas, USA	Capacity management	Two categories (referred to as "states of the world (SOW)"): Scaling factor going into Monte Carlo model in R for probabilities of: • Low inﬂows • High losses • High demands • High lease prices • Losses in Reservoir storage (Linked to climate change) Sampled model parameters (static inputs to Monte Carlo R: • Initial rights ("The city begins with a volume of water controlled by initial rights, an…	Climatic Economic Societal Physical	Both	Parameter	Four cases based upon different portfolios of "water supply instruments" (permanent rights, spot leases, and options - spot price variable market value, options give some staility to cost) and different breakdown of arrangements between halves of the year. Parameters within each of these contracts are explored using MORDM for each of the four cases (around how much water & when by contract type, …	Operational	12	12	Choice of four contract options (all offered by the city, I believe) leads to different water flow behaviour. Arguably different models (-> L5. rules?), but since all are offered by the city, and impact of changing rules not under consideration, makes case for 12.	The “relationship” for our problem formulation uses a 10-year expected performance Monte Carlo simulation and an extreme drought, both with a monthly timestep. For further details about the simulation model and its implementation, the reader is encouraged to consult a series of prior studies (Characklis et al., 2006; Kirsch et al., 2009; Kasprzyk et al., 2009, 2012). The simulation model samples …	Water Model	• 10-yr. cost • 10-yr. surplus water • 10-yr. critical reliability • 10-yr. drops • 10-yr. number of leases • Drought trans. cost
26	Strengthening Coastal Planning in Louisiana, USA	Groves, D. G. et al. (2014) Strengthening Coastal Planning: How Coastal Regions Could Benefit from Louisiana’s Planning and Analysis Framework. RAND Corporation (EBL-Schweitzer). Available at: https://www.rand.org/pubs/research_reports/RR437.html.	Coastal Protection and Restoration Authority of Louisiana. Louisiana’s Comprehensive Master Plan for a Sustainable Coast, Appendix C: Environmental Scenarios. (2012). (Defines scenarios more clearly) ﻿Peyronnin, N. et al. Louisiana’s 2012 coastal master plan: Overview of a science-based and publicly informed decision-making process. J. Coast. Res. 67, 1–15 (2013). (Clearer on DMDU approach)	Robust Decision Making	Water	Louisiana USA	Disaster Resilience	Divided into two categories: Environmental uncertainties (1) (grouped to 2 values: "moderate", "less optimistic" amalgamating sea level rise, subsidence, storm intensity&frequency, river discharge, rainfall, evapotranspiration, nutrient cocentration, marsh collapse threshold), Risk reduction uncertanties (5): protection system fragility, pumping effectiveness, coast wide growth rate, population d…	Climatic Environmental Societal Technological	Both	Parameter	With and without "master plan" incorporating: structural protection, bank stabilisation, Oyster barrier reef, ridge restoration, shoreline protection, barrier island restoration, marsh creation, channel realignment, sediment diversion, hydrolic restoration	Infrastructure	10	10	Infrastructure changes affecting material flows	New model developed linking a range of existing models and developing new models to assess Ms with range of measures in R under Xs. Linked models for: Eco-hydrology, Wetland morphology, Vegetation, Ecosystem services, Barrier shoreline morphology, Storm surge/waves, Risk assessment	Water Model	9 "decision criteria" that "reflect the master plan objectives" 3 "additional metrics" described as "ecosystem service metrics, risk reduction metrics, and a critical landform criterion" Decision criteria: Distribution of Flood Risk across Socioeconomic Groups, Use of Natural Processes, Sustainability of Land, Operation and Maintenance Costs at Year 50, Support of Cultural Heritage, Flood Protect…
27	Flood risk management in Ho Chi Minh City, Vietnam	Lempert, R. et al. (2013) Ensuring Robust Flood Risk Management in Ho Chi Minh City, Policy Research Working Papers. The World Bank. doi: doi:10.1596/1813-9450-6465.		Robust Decision Making	Water	Vietnam	Disaster Resilience	• Hazard-related uncertainties o Rainfall intensity increase o Relative Saigon River height • Exposure-related uncertainties o Population o Geographic population distribution o Poverty rate o Average annual economic growth o Economic wealth distribution • Vulnerability-related uncertainties o Population vulnerability (proportion of population affected at 10cm depth) o Economic vulnerability (econ…	Climatic Economic Societal Physical	Both	Parameter	• Baseline infrastructure • Baseline infrastructure augmented statically and adaptively with o Exposure-reducing options - Groundwater recharge - Rainwater capture - Relocating vulnerable areas o Vulnerability-reducing options - Elevating buildings	Infrastructure Relocation	10	10	Relocation -> will necessitate changes in material flow structure	• Integrated Analytica risk model based upon: • SWMM model for hazard • ArcGIS model for exposure • Vulnerability curves	Water Model	• Risk to poor • Risk to non-poor • Economic risk
28	Pathways to zero carbon water in London, UK	﻿Majid, A., Mortazavi-Naeini, M. & Hall, J. W. Efficient pathways to zero-carbon energy use by water supply utilities: An example from London, UK. Environ. Res. Lett. 16, (2021).		MORDM	Water	London, UK		• Climate scenario • Electricity Prices (3 scenarios) • Rainfall runiff dynamics (influenced by liate change model) • Water demands (3 scenarios)	Climatic Physical Economic Societal	Both	Parameter	Water 1 48 km pipeline from Deerhurst to Cricklade 2 58 km pipeline from Deerhurst to Radcot 3 87 km pipeline from Lechlade to Culham 4 Indirect effluent reuse scheme 5 Brackish desalination at Beckton 6 Seawater desalination at Beckton 7 21 km transfer from Draycote 8 40 km transfer from Minworth 9 5 km transfer from Mythe 10 170 km transfer from Lake Vyrnwy Energy 11 Solar PV 12 Wind turbines 1…	Infrastructure Operational	10	10	New infrastructure -> changing material flows	Model of pro-suming water utility (water & energy)	Water Model
29	Stormwater management, Pennsylvania, USA	﻿Wilson, M. T., Fischbach, J. R., Siler-Evans, K. & Tierney, D. Modeling the uncertainty of potential impacts on Robust Stormwater Management from neighborhood-scale impervious cover change: a case study of population-based scenarios in Pittsburgh, Pennsylvania. Urban Water J. 17, 628–641 (2020).	Fischbach, J. et al. Robust Stormwater Management in the Pittsburgh Region: A Pilot Study. Robust Stormwater Management in the Pittsburgh Region: A Pilot Study (2017). doi:10.7249/rr1673	RDM	Water	Pittsburgh, Pennsylvania, USA		• Precipitation – 2003 Typical Year – Recent Historical (2004–2013) – Climate-adjusted (2038–2047) • Temperature – Recent Historical (2004–2013) – Climate-adjusted (2038–2047) • Impervious area (land use) – Current – Southwestern Pennsylvania Commission (SPC) growth – 2xPGH (high growth) • Wastewater customers • green stormwater infra- structure (GSI) infiltration rate: "GSI is intended to divert…	Climatic Environmental Economic Societal	Both	Parameter	• Policy levers and individual strategies – Inflow and infiltration (I&I) reduction (mainly leaky pipe & manhole cover repair) – Green stormwater infra- structure (GSI) – waste- water treatment plant (WWTP) expansion • Interceptor cleaning Combined strategies: "cleaning the existing main interceptor tunnels along the Allegheny, Monongahela, and Ohio rivers to increase conveyance and storage capac…	Infrastructure	10	10	Green stormwater infrastructure -> changing material flows	• SWMM 5.1 H&H models • Downscaled climate-informed precipitation and temperature • Land-use change module (ArcGIS) • Infrastructure cost estimation tools	Water Model	• CSO volume by outfall (gal.) • SSO volume by outfall (gal.) • Time in overflow by outfall (hours) • Capital cost of implementation (2016 dollars) • Cost-effectiveness ($/gal.)
30	River flood management, Talegham Iran	Sobhaniyeh, Z., Niksokhan, M. H., Omidvar, B. & Gaskin, S. Robust Flood Risk Management Strategies Through Bayesian Estimation and Multi-objective Optimization. Int. J. Environ. Res. 15, 1057–1070 (2021).		MORDM	Water	upper catchment of the Taleghanrood river, Taleghan district, Iran		• flood probability before the start of change to the infrastructure • parameter representative of the exponential distribution for extreme water levels, • the increase in the water level due to levee heightening [elsewhere described as changing height due to climate change]	Climatic Environmental Physical	Both	Parameter	Increased height of flood levies	Infrastructure	10	10	New infrastructure -> changing material flows	Hydrologic and Hydraulic Model of the Taleghanrood River	Water Model	• Failiure probability • Cost function (infrastructure cost - flooding losses) • Reliability (flooded area per year) • Inertia (aiming for similar amount of infrastructure build per year)
31	Water resource planning in India	Bhave, A. G. et al. (2018) ‘Water Resource Planning Under Future Climate and Socioeconomic Uncertainty in the Cauvery River Basin in Karnataka, India’, Water Resources Research. John Wiley & Sons, Ltd, 54(2), pp. 708–728. doi: 10.1002/2017WR020970.		Adaptation Pathways	Water	Cauvery River Basin in Karnataka, India	Capacity management	precipitation water demand	Climatic Societal	Scenario Only	None	1 25% Urban Grey Water Recycling 2 50% Urban Grey Water Harvesting 3 25% Urban Rain Water Recycling 4 50% Urban Rain Water Harvesting 5 Better Enforcement of Laws 6 Urban Water Pricing 7 1.5 mha Microirrigation 8 2.5 mha Microirrigation 9 5% Drip Irrigation 10 10% Drip Irrigation 11 Agricultural Water Pricing 12 Interbasin Transfer (100 MCM) 13 Interbasin Transfer (88 MCM) 14 Cauvery Stage V—Phas…	Infrastructure Operational (Dis)incentive Enforcement	10	5	"better enforcement of laws" could be argued to be 5. Prices relate to information flows -> potentially 6. However, since it is only considered in terms of particular flow parameters "10% reduction in annual urban water demand and a reduction of water consumed in urban areas by 33%.", 12 seems more appropriate. 10 for new flows in proposed measures.	WEAP "water resources model is calibrated and validated satisfactorily using observed streamflow "	Water Model	basin-wide metric comprising legal instream flow requirements for the downstream state, local metric comprising water supply reliability to Bangalore city
32	Water resource management in the Shaanxi Province, People's Republic of China	Ren, K. et al. (2019) ‘Defining the robust operating rule for multi-purpose water reservoirs under deep uncertainties’, Journal of Hydrology, 578, p. 124134. doi: https://doi.org/10.1016/j.jhydrol.2019.124134.		Many-Objective Robust Decision Making	Water	Shaanxi Province, China	Capacity management	Climate variability (linked to climate change) Water demand	Climatic Environmental Societal	Scenario Only	None	Rule Curve defining water levels at which different pumping actions are taken (or domestic or industrial demand is "hedged") by month - affects balance of water supply and hydroelectric power generation	Operational	12	5	Basic levers are operational parameters. Different options relate to different rules, but process of rule change (deeper lever 5)not explicitly considered.	Water optimisation model	Water Model	• Water shortage index • Revenue
33	Water allocation under climate change in the Pearl River Basin, People's Republic of China	Yan, D. et al. (2017) ‘Many-objective robust decision making for water allocation under climate change’, Science of The Total Environment, 607–608, pp. 294–303. doi: https://doi.org/10.1016/j.scitotenv.2017.06.265. AND Yan, D. (2017) Water allocation under future climate change and socio-economic development: the case of Pearl River Basin. Wageningen University. Available at: https://edepot.wur.n…		Many Objective Robust Decision Making and Biophysical Modelling	Water	Pearl River basin (PRB), China	Capacity management	Climate change -> water availability (RCPs) Socio-economic development (SSPs)	Climatic Societal Economic	Scenario Only	None	Water allocation strategy (4 investigated: upstream prioritised, delta-prioritised, manufacture prioritised, agricultue prioritised)	Operational	12	5	Basic levers are operational parameters. Different options relate to different rules, but process of rule change (deeper lever 5)not explicitly considered.		Water Model	• Minimise variation between minimum required flow & discharge across locations • Maximise hydropower • minimize the average numbers of days that discharge is less than the required minimum
34	Urban climate change adaptation in London, UK	Kingsborough, A. (2016) Urban climate change adaptation pathways for short to long term decision-making. University of Oxford. Available at: https://ora.ox.ac.uk/objects/uuid:f6eda340-2699-4a0d-9920- 7464f524a73a/download_file?file_format=pdf&safe_filename=KINGSBOROUGH%252C%2BUrban% 2Bclimate%2Bchange%2Badaptation%2Bpathways%2Bfor%2Bshort%2Bto%2Blong%2Bterm%2Bdecision-making.pdf&type_of_work=The.…		Adaptation Pathways	Water	London, UK	Capacity management	Population Growth Discount Rate	Societal Economic	Scenario Only	None	Tiered pricing Education & awareness Universal metering Efficiency technologies Leakage reduction Groundwater & ASR (?) Interbasin transfers Reservoirs Desalination Water re-use	Infrastructure Operational Education (Dis)incentive	10	6	New reservoirs & water re-use plant consitute new infrastructure & material flow structure. Education, awareness, & monitoring all relate to flow of information, so could be seen as deeper levers (6), but are represented only as a change in flow, and therefore are at L12. Meadows implies information can lead to new feedback loops & system behaviour, the possibility for which this is not included …	Expected rainfall from met office (based upon a large ensemble of future climate conditions obtained from the UKCP09 climate projections), combined with river flow models -> available water	Water Model	Cost (NPV), Probability of frequency of: - Media campaign - Hosepipe ban - Temporary use ban - Emergency drought order exceeding 1/5,1/10,1/20,1/1000 yrs respectively (levels desired by stakeholders)
35	Water-Management Strategies in California, USA	Groves, D. G. and Bloom, E. (2013) Robust Water-Management Strategies for the California Water Plan Update 2013, RAND Corporation, Santa Monica, CA. Citeseer. Available at: http://citeseerx.ist.psu.edu/viewdoc/download?doi=10.1.1.396.7456&rep=rep1&type=pdf.		Robust Decision Making	Water	California USA	Capacity management	• population • household factors • employment factors • climate sequences, which describe changes in temperature and precipitation	Climatic Societal	Scenario Only	None	• agricultural water-use efficiency • urban water-use efficiency • conjunctive management and groundwater storage • recycled municipal water	Infrastructure Operational	10	10	New structure of material flows associated with conjunctive management and/or recycling municipal water	WEAP Central Valley Model (Sacramento River and San Joaquin River hydrologic regions)	Water Model	Urban supply reliability Agricultural supply reliability IFRs (frequency of meeting in-stream flow requirements) Notional costs
36	Hydropower decision-making under uncertainty in Nepal	Hurford, A. P. (2016) Accounting for water-, energy-and food-security impacts in developing country water infrastructure decision-making under uncertainty. UCL (University College London). Available at: https://discovery.ucl.ac.uk/id/eprint/1524233/1/Hurford_APH_thesis_final_revised_review2_final.pdf.		Robust Decision Making	Water	Koshi Basin, Nepal	Capacity management	Water availability: • River flows (linked to climate change) • Abstraction demands • Environmental flow releases Socio-economic: • Wholesale price of electricity (US$/kWh) in Wet Season (May-Nov)/Dry Season (Dec-Apr) • Discount Rate • Estimated Lifetime of the Plant (years) •Capital Costs (2013 US$)	Climatic Environmental Societal Lifetime	Scenario Only	None	• Build/no build of each of 9 proposed dam options • Five storage dependent release rule co-ordinates, for each of two seasons and each of two storage dams • Two dates controlling timing of two storage dam release rule seasons.	Infrastructure Operational	10	10	Building dams will change structure of material flows. Judging rules here to be more like operational; parameters than rules as defined by Meadows.	IRAS-2010 (Matrosov et al., 2011) Koshi River basin model	Water Model	1) capital expenditure (capex) (US$M) 2) dry season electricity generation (Dec-April, GWh) 3) total annual electricity generation (GWh) 4) firm electricity generation (99.5% reliability) 5) urban water deficit (Mm3/year) 6) irrigation deficit (Mm3/year) 7) flood peak at the basin outlet (m3/s) 8) number of environmental flow failures downstream of dams (occurrences)
37	Long-term water resources planning in Lima, Peru	Kalra, N. et al. (2015) Robust Decision-Making in the Water Sector: A Strategy for Implementing Lima’s Long-Term Water Resources Master Plan, Policy Research Working Papers. The World Bank. doi: doi:10.1596/1813-9450-7439.		Robust Decision Making	Water	Lima, Peru	Capacity management	● Future water demand ● Future stream flow (related to climate change) ● Project feasibility (two future conditions—a “full project feasibility” future condition in which the three difficult projects can be implemented, and a “limited project feasibility” future condition in which they cannot. )	Climatic Societal Physical	Scenario Only	None	● 12 projects in SEDAPAL’s Master Plan ● 2 additional projects ● Budget for infrastructure (100%, 75%, 50% of required for full SEDAPAL plan) ● (Efficiency and demand management) (Not actually modelled, but the authors think this would be a sensible think for SEDAPAL to focu on (Subset of SEDAPAL's master plan implemented depnding on budget level - 'decision support tool [used] to first identify …	Infrastructure	10	10	Master plan includes new infrastructure changuing material flows, eg. desalination plants .	● WEAP Model ● Interactive, analytic decision support tool (Described as two models, really it's one model for the system and a visualisation tool ("interactive, analytic decision support tool") to help stakeholders understand & interact with results)	Water Model	● 90th percentile of monthly met demand, as a percent of total demand ● Cost of plan
38	Water management planning in London, UK	Matrosov, E. S. (2015) Planning water resource systems under uncertainty. UCL (University College London). Available at: https://discovery.ucl.ac.uk/id/eprint/1468958/.		Robust Decision Making and Info-Gap	Water	Thames Basin, UK	Capacity management	• Natural hydrological variability • Climate change perturbation • Water demand • Energy prices	Climatic Environmental Economic Societal	Scenario Only	None	• New reservoirs (three possible capacities) • River Transfer (Severn -> Thames) • Desalination plants • Artificial groundwater storage & recovery	Infrastructure Operational	10	10	New reservoirs & desalination plants will change structure of material flows	Application of IRAS-2010 (interactive river-aquifier simulation) water resource management simulation model to Thames Basin	Water Model	• reliability of water supply service • maximum reservoir storage deficit • environmental performance • energy consumption • total costs (capital and operating).
39	Urban storm water management in Singapore city, Republic of Singapore	Manocha, N. and Babovic, V. (2017) ‘Development and valuation of adaptation pathways for storm water management infrastructure’, Environmental Science & Policy, 77, pp. 86–97. doi: https://doi.org/10.1016/j.envsci.2017.08.001. AND Manocha, N. and Babovic, V. (2018) ‘Real options, multi-objective optimization and the development of dynamically robust adaptive pathways’, Environmental Science & Pol…		Adaptation Tipping Points\ and Adaptation pathways	Water	Singapore	Disaster Resilience	Climatic conditions: • Baseline: Extrapolation of historical trend • W1 (Wet 1): 10% wetter climate (2016–2100), compared to baseline • W2 (Wet 2): 25% wetter climate (2016–2100), compared to baseline • D1 (Dry 1): 10% dryer climate (2016–2100), compared to baseline Land Use: Broken down into %s of 6 types: - Impervious - Grass on steep slope - grass on mild slope - Mixed grass and trees - natura…	Climatic Societal	Scenario Only	None	Drainage increase porous pavements green roofs	Infrastructure	10	10	Porous pavements & green roofs will change structure of material flows	Adaptation of pre-existing model for "Kent ridge catchment area". Assesses economic cost/benefit at different levels of annual precipitation	Water Model	Cost/benefit, broken down by: Costs: • maintenance cost of each active adaptation action, • the switching cost associated with changing from one adaptation action to another when an adaptation tipping point is encountered • if applicable, the water treatment costs for recycling the water generated from porous pave- ments and green roofs. Benefits: • flood alleviation (assessed based on "flood dam…
40	Urban flood risk infrastructure design in London UK	Babovic, F. (2018) Development and assessment of adaptive urban flood risk infrastructure under conditions of deep uncertainty. Imperial College London. Available at: https://spiral.imperial.ac.uk/handle/10044/1/73106.	Babovic F, Mijic A, Water 2019, 11(3), 531; https://doi.org/10.3390/w11030531	Adaptation tipping points / Adaptation Pathways	Water	London UK	Disaster Resilience	Storm Depth/year	Climatic	Scenario Only	None	• Deepen lake • Green roofs • Porous pavement • increase diameter of trunk drain	Infrastructure	10	10	Infrastructure changes	Infoworks ICM fooding simulation software, with model created and calibrated during "RainGain" project		Cost / benefit
41	Climate change adaptation pathways in agricultural water management in Hablehroud River Basin, Iran	Babaeian, F., Delavar, M., Morid, S. & Srinivasan, R. Robust climate change adaptation pathways in agricultural water management. Agric. Water Manag. 252, 106904 (2021).		Adaptation Pathways	Water	Hablehroud River Basin, Iran		Climate scenario	Climatic	Scenario Only	None	deficit irrigation (DI), increasing irrigation efficiency (IE), changing planting dates (PD) and change in cropping pattern (CP)	Infrastructure Operational	10	10	Parameters & new infrastruture. In practice changing cropping & planting dates would clearly require information flow changes to realise (L6)	Soil and Water Assessment Tool (SWAT)		Blue water scarcity Ground water scarcity Environmental blue water scarcity Relative change in agricultural calorie production
42	Coastal sea level adaptation in Miami-Dade County, Florida, USA	Obeysekera, J., Haasnoot, M. & Lempert, R. How are decision-science methods helping design and implement coastal sea-level adaptation projects? US CLIVAR Var. 18, 1–34 (2020).		Dynamic Adaptive Policy Pathways	Water	Little River Basin, Miami-Dade County, Florida		• Sea level rise (/date)	Climatic	Scenario Only	None	• M1: local flood mitigation, consisting of flood walls, additionalexfiltrationtrenches,flapgates,andlocal pumps; • M2: regional flood mitigation, consisting of the installation of forward pumps at the S-27 coastal structure; and • M3: land-use mitigation consisting of improved building codes to raise roads and buildings to a level of 6, 7, or 8 feet NGVD which correspond to flood levels under cu…	Infrastructure Regulation	10	10	New infrastructure -> changing material flows	Storm water management model -> damage assessment model		Expected annual damages
43	Coastal flood adaptation, Shanhai, China	Shan X, Wang J, Wen J, Hu H, Wang L, Yin J, et al. Using Multidisciplinary Analysis to Develop Adaptation Options against Extreme Coastal Floods. International Journal of Disaster Risk Science 13(4):577–91. (2022) Available from: https://doi.org/10.1007/s13753-022-00421-6		DAPP	Water	Shanghai, China		Sea level rise, land subsidence	Climatic	Scenario Only	None	Dry floodproofing Wet floodproofing Elevation	Infrastructure	10	10	Material infrastructure measure	two-dimensional hydrodynamic model coupled with land use model	Water model	Cost/benefit
44	Urban drainage in Kiruna, Sweden	﻿Zischg, J. et al. (2019) ‘Future trajectories of urban drainage systems: A simple exploratory modeling approach for assessing socio-technical transitions’, Science of the Total Environment. Elsevier B.V., 651, pp. 1709–1719. doi: 10.1016/j.scitotenv.2018.10.061.		Exploratory Modeling	Water	Kiruna, Sweden		Population growth, policy environment, climatic conditions	Climatic Societal	Scenario Only	None	Green Roofs Raingardens Sand filters Pervious Pavements	Infrastructure	10	10	Material infrastructure measure	Biophysical model	Water model	Flood volume Runoff

## Sheet: Analysis
Parameter	Number	Notes
Sector
Water	34
Transport	12
Power	4
Telecomms	0
Waste	0
DMDU Method
Robust Decision Making	22	RDM
Exploratory Modeling	6	EM
Adaptation Pathways	5	AP
Many-Objective Robust Decision Making	3	MORDM
Dynamic Adaptive Policy Pathways	2	DAPP
Info-gap	2	IG
Dynamic Adaptive Planning	2	DAP
X Categories
Societal	32	Elasticities (eg. VMT vs cost, pop growth), population growth/distribution, employment factors, traffic growth, land use, (parking density, green infrastructure), irrigation system, aeroplane demand, water demand, city water rights, poverty rate, wealth distribution, achievement of water management strategies, millenial behaviour (wrt car uptake), trade volume, agent contact rate, distance thresh…
Climatic	30	Climate Change Scenario, associated sea level rise, rainfall, changing wind conditions
Economic	17	costs (plant build, water transfer, energy price, lease price, water import/efficiency measures, port handling, fuel conversion kit), discount rates, insurance, economic growth
Environmental	13	Hydrological scenario, evapotranspiration, nutrient concentration, marsh collapse threshold, environmental flow releases, reservoir sediment, flooding frequency
Physical	11	availability of (new) water resource, feasibility of water project implementation, initial reservoir level, response of groundwater basin to urbanization and changes in precipitation patterns, rainfall runoff dynamics, General Circulation Model (GCM), downscaling technique, increase in the water level due to levee heightening,
Technological	9	Noise impact of planes, protection system fragility, pumping effectiveness, fuel efficiency, roadway capacity % increase due to AVs
Lifetime	5	Life of plant being built, life of port terminal being upgraded, house lifetime
Implementation Time	4	Time to build plant, time to repair roads after flood damage
Scenario or Structural Uncertainty?
Scenario Only	23
Structural Only	0
Both	21
Location of structural uncertainty
None	23
Parameter	16
Functional Form	4
Relationships	1
L categories
Infrastructure	33	Infrastructure changes - build/expand/upgrade/decomission power plants, roads, water pumps, levies, water recycling facilities. reservoirs, rail line. Timing/sequencing/location/scale sometimes a parameter under exploration.
Operational	17	change parameters relating to how infrastructure is operated. eg. move flights, change pumping thresholds, maintainenece regimes
(Dis)incentive	5	Impose price/subsidy (eg. water supply price, ), VMT fee, ZEV incentive,
Education	3	education programme to reduce urban water use
Regulation	2	negotiate noise requirements for air craft, minimum building height (near flood plain). Better enforce existing rules/laws
Insurance	1
Transport Model Intent
Capacity management	4
Resilience	5
Transition	3
Transport Model Types
OD Pair	3
Cost Benefit	3
Elasticity	2
Four Stage	1
System Dynamics	1
Agent Based	1
Other	1
		All Infrastructure Cases		Transport Cases
L Max Depth	L Max Depth	Considered	Potential	Considered	Potential
1	1. Transcend Paradigm	0	0	0	0
2	2. Mindset/paradigm	0	0	0	0
3	3. System goals	0	0	0	0
4	4. System structure	0	0	0	0
5	5. Rules of system	0	5	0	1
6	6. Information flows	0	3	0	0
7	7. +ve feedback strength	0	0	0	0
8	8. -ve feedback strength	0	0	0	0
9	9. Feedback delay	0	0	0	0
10	10. Physical structure	33	28	8	7
11	11. Stock size rel. to flow	1	1	0	0
12	12. Parameters	8	5	2	2

## Sheet: Search Terms
Google Scholar Search Info	(Final searches conducted 17 Dec 2022)
Method	Acronym	Sector	Hits (post 2010)	Hits (post 2020)	Relevant Hits (post 2020)	Search term
Robust Decision Making	RDM	Water	N/A	138	1	"deep uncertainties" AND "Robust Decision Making" AND "water" AND "case study"
Robust Decision Making		Power	N/A	79		"deep uncertainties" AND "Robust Decision Making" AND "power" AND "energy" AND "case study"
Robust Decision Making		Transport	N/A	57	2	"deep uncertainties" AND "Robust Decision Making" AND "transport" AND "case study"
Robust Decision Making		Telecomms	N/A	9		"deep uncertainties" AND "Robust Decision Making" AND "telecommunications" AND "IT" AND "case study"
Robust Decision Making		Waste	N/A	31		"deep uncertainties" AND "Robust Decision Making" AND "waste" AND "case study"
Dynamic Adaptive Planning	DAPP	Water	N/A	13		"deep uncertainties" AND "Dynamic Adaptive Planning" AND "water" AND "case study"
Dynamic Adaptive Planning		Power	N/A	4		"deep uncertainties" AND "Dynamic Adaptive Planning" AND "power" AND "energy" AND "case study"
Dynamic Adaptive Planning		Transport	N/A	9		"deep uncertainties" AND "Dynamic Adaptive Planning" AND "transport" AND "case study"
Dynamic Adaptive Planning		Telecomms	N/A	1		"deep uncertainties" AND "Dynamic Adaptive Planning" AND "telecommunications" AND "IT" AND "case study"
Dynamic Adaptive Planning		Waste	N/A	5		"deep uncertainties" AND "Dynamic Adaptive Planning" AND "waste" AND "case study"
Dynamic Adaptive Policy Pathways	DAP	Water	N/A	86	1	"deep uncertainties" AND "Dynamic Adaptive Policy Pathways" AND "water" AND "case study"
Dynamic Adaptive Policy Pathways		Power	N/A	44		"deep uncertainties" AND "Dynamic Adaptive Policy Pathways" AND "power" AND "energy" AND "case study"
Dynamic Adaptive Policy Pathways		Transport	N/A	39		"deep uncertainties" AND "Dynamic Adaptive Policy Pathways" AND "transport" AND "case study"
Dynamic Adaptive Policy Pathways		Telecomms	N/A	3		"deep uncertainties" AND "Dynamic Adaptive Policy Pathways" AND "telecommunications" AND "IT" AND "case study"
Dynamic Adaptive Policy Pathways		Waste	N/A	18		"deep uncertainties" AND "Dynamic Adaptive Policy Pathways" AND "waste" AND "case study"
Info-Gap	IG	Water	N/A	28		"deep uncertainties" AND "info-gap decision theory" " AND "water" AND "case study"
Info-Gap		Power	N/A	14		"deep uncertainties" AND "info-gap decision theory" " AND "power" AND "energy" AND "case study"
Info-Gap		Transport	N/A	9		"deep uncertainties" AND "info-gap decision theory" " AND "transport" AND "case study"
Info-Gap		Telecomms	N/A	1		"deep uncertainties" AND "info-gap decision theory" " AND "telecommunications" AND "IT" AND "case study"
Info-Gap		Waste	N/A	8		"deep uncertainties" AND "info-gap decision theory" " AND "waste" AND "case study"
Engineering Options Analysis	EOA	Water	N/A	8		"deep uncertainties" AND "Engineering Options Analysis" AND "water" AND "case study"
Engineering Options Analysis		Power	N/A	4		"deep uncertainties" AND "Engineering Options Analysis" AND "power" AND "energy" AND "case study"
Engineering Options Analysis		Transport	N/A	5		"deep uncertainties" AND "Engineering Options Analysis" AND "transport" AND "case study"
Engineering Options Analysis		Telecomms	N/A	1		"deep uncertainties" AND "Engineering Options Analysis" AND "telecommunications" AND "IT" AND "case study"
Engineering Options Analysis		Waste	N/A	4		"deep uncertainties" AND "Engineering Options Analysis" AND "waste" AND "case study"
Exploratory Modeling	EM	Water	189	N/A	1	"deep uncertainties" AND "Exploratory Modeling" AND "water" AND "case study"
Exploratory Modeling		Power	109	N/A	1	"deep uncertainties" AND "Exploratory Modeling" AND "power" AND "energy" AND "case study"
Exploratory Modeling		Transport	108	N/A	4	"deep uncertainties" AND "Exploratory Modeling" AND "transport" AND "case study"
Exploratory Modeling		Telecomms	4	N/A		"deep uncertainties" AND "Exploratory Modeling" AND "telecommunications" AND "IT" AND "case study"
Exploratory Modeling		Waste	46	N/A		"deep uncertainties" AND "Exploratory Modeling" AND "waste" AND "case study"
		Total post-2020 (non EM)		618
		Pre-2020 (non EM)		2053		0
		All time (EM)		456
		Total all time		3127
NB. Searches with the DMDU method "Exploratory Modeling" were carried out for all studies published between 2010 and December 2022. Searches with other DMDU methods had been conducted up to February 2020 in Bonjean-Stanton's (2021) literature review, and so additional searches were conducted to cover the period between when Bonjean-Stanton's (2021) literature search concluded and the cutoff date …
